# Supplementary material
Source: PubMed Central journal article supplement (PMC7796991)
Supplement: NIHMS1630825-supplement-Supplementary___Appendix__online_only_material__etc__.pdf [file NIHMS1630825-supplement-Supplementary___Appendix__online_only_material__etc__.pdf]

## SUPPLEMENTARY TABLES

**Table S1.** Clinical and biochemical data for CPA with and without *PRKAR1B* CNV

|                                                 | <b>Patients with<br/><i>PRKAR1B</i><br/>CNV</b> | <b>Patients without<br/><i>PRKAR1B</i><br/>CNV</b> |
|-------------------------------------------------|-------------------------------------------------|----------------------------------------------------|
| N                                               | 3                                               | 18                                                 |
| Gender (F/M)                                    | 3/0                                             | 15/3                                               |
| Age (years) <sup>a</sup>                        | 47.74 ± 3.35                                    | 39.54 ± 5.03                                       |
| Midnight serum cortisol (nmol/L) <sup>a</sup>   | 304.98 ± 131.10                                 | 365.70 ± 76.17                                     |
| Morning serum cortisol (nmol/L) <sup>a</sup>    | 347.76 ± 85.56                                  | 451.26 ± 59.89                                     |
| Post-LDDST serum cortisol (nmol/L)              | 474.72 ± 0.00                                   | 488.24 ± 108.46                                    |
| Post-HDDST serum cortisol (nmol/L)              | 452.64 ± 0.00                                   | 308.56 ± 57.13                                     |
| UFC (nmol/day) <sup>a</sup>                     | 241.36 ± 238.88                                 | 342.52 ± 102.67                                    |
| Change of UFC (%) <sup>b</sup>                  | 1.30                                            | 61.96                                              |
| Urine 17-OHS (μg/g creatinine/24h) <sup>a</sup> | 15.00 ± 4.80                                    | 8.88 ± 1.56                                        |
| Pre-Liddle urine 17-OHS (μg/g creatinine/24h)   | 15.20 ± 5.00                                    | 9.23 ± 2.16                                        |
| Post-Liddle urine 17-OHS (μg/g creatinine/24h)  | 14.65 ± 10.45                                   | 12.80 ± 1.96                                       |
| ACTH (pg/mL) <sup>a</sup>                       | <0.05                                           | 0.07 ± 0.02                                        |
| Size of tumor (cm)                              | 4.00 ± 1.00                                     | 3.38 ± 0.39                                        |

Data are presented as mean ± SEM or percentage; <sup>a</sup>At the time of diagnosis; <sup>b</sup>Percentage of change Pre- and Post-Liddle test; CPA, cortisol-producing adrenal adenomas; CNV, copy number variants; F, females; M, males; LDDST, low-dose dexamethasone suppression test; HDDST, high-dose dexamethasone suppression test; UFC, urinary free cortisol; 17-OHS, 17-hydroxycorticosteroid; ACTH, adrenocorticotropin hormone; To convert serum cortisol *nmol/L* to *μg/dL*, divide by 27.588; UFC *nmol/day* to *μg/24h*, divide by 2.76; Urine 17-OHS *μg/g creatinine* to *mmol/mol creatinine*, multiply by 0.000312; ACTH *pg/mL* to *pmol/L*, multiply by 0.22.

**Table S2.** *In silico* analyses of *PRKAR1B* variants

| Patient ID | Gene    | Transcript     | dbSNP ID    | HGVS coding | HGVS Protein | Allele Frequency <sup>a</sup> | SIFT <sup>b</sup> | Polyphen2 <sup>c</sup> | Mutation Taster <sup>d</sup> | Mutation Assessor <sup>e</sup>     | FATHMM <sup>f</sup> |
|------------|---------|----------------|-------------|-------------|--------------|-------------------------------|-------------------|------------------------|------------------------------|------------------------------------|---------------------|
| CAR757.03  | PRKAR1B | NM_001164760.2 | rs61732492  | c.118A>G    | p.I40V       | 0.013545                      | Tolerated         | Benign                 | Damaging                     | Predicted non-functional (neutral) | Tolerated           |
| CAR762.03  | PRKAR1B | NM_001164760.2 | rs183383238 | c.200C>T    | p.A67V       | 0.00019396                    | Damaging          | Benign                 | Damaging                     | Predicted non-functional (neutral) | Damaging            |
| CAR521.01  | PRKAR1B | NM_001164760.2 | rs376485407 | c.898G>A    | p.A300T      | 0.0000648                     | Damaging          | Probably damaging      | Damaging                     | Predicted functional (medium)      | Damaging            |

<sup>a</sup>Allele Frequency extracted from gnomAD version 2.0.1; *In silico* analyses done using the prediction tools: <sup>b</sup>Sorting Tolerant From Intolerant, <sup>c</sup>Polymorphism Phenotyping v2, <sup>d</sup>MutationTaster, <sup>e</sup>Mutation Assessor, <sup>f</sup>Functional Analysis through Hidden Markov Models v2.3

**Table S3. Somatic variants of *PRKAR1B* in different tissues**

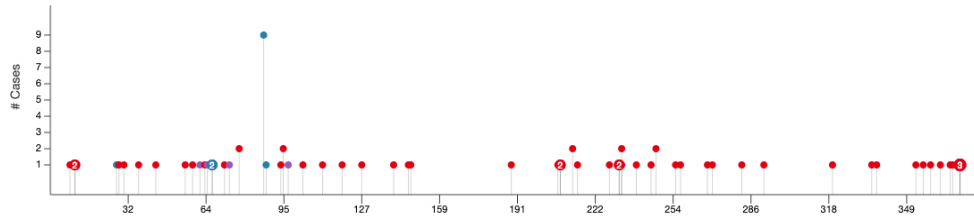

| Tissue                                | Variant Type                 | Protein Change | DNA Change (hg38)                                       | Gene    |
|---------------------------------------|------------------------------|----------------|---------------------------------------------------------|---------|
| Bladder                               | Stop Gained                  | Q371*          | chr7:g.550465G>A                                        | PRKAR1B |
| Bladder                               | Missense                     | E257Q          | chr7:g.584508C>G                                        | PRKAR1B |
| Bladder                               | Missense                     | R232W          | chr7:g.596160G>A                                        | PRKAR1B |
| Brain                                 | Missense                     | A270V          | chr7:g.579338G>A                                        | PRKAR1B |
| Brain                                 | Missense                     | L66V           | chr7:g.680708A>C                                        | PRKAR1B |
| Breast                                | Missense                     | K367N          | chr7:g.550475C>G                                        | PRKAR1B |
| Bronchus and Lung                     | Missense                     | Q371K          | chr7:g.550465G>T                                        | PRKAR1B |
| Bronchus and Lung                     | Missense                     | G319A          | chr7:g.551406C>G                                        | PRKAR1B |
| Bronchus and Lung                     | Stop Gained                  | Q64*           | chr7:g.680714G>A                                        | PRKAR1B |
| Bronchus and Lung                     | Missense                     | Q28K           | chr7:g.711424G>T                                        | PRKAR1B |
| Bronchus and Lung; Pancreas           | Missense                     | E247K          | chr7:g.584538C>T                                        | PRKAR1B |
| Bronchus and Lung; Prostate gland     | Missense                     | R335W          | chr7:g.550573G>A                                        | PRKAR1B |
| Bronchus and Lung; Skin               | Missense                     | S77F           | chr7:g.680674G>A                                        | PRKAR1B |
| Cervix uteri                          | Missense                     | A127V          | chr7:g.677289G>A                                        | PRKAR1B |
| Cervix uteri                          | Stop Gained                  | S73*           | chr7:g.680686G>C                                        | PRKAR1B |
| Cervix uteri                          | Missense                     | S71L           | chr7:g.680692G>A                                        | PRKAR1B |
| Colon                                 | Missense                     | E103K          | chr7:g.680597C>T                                        | PRKAR1B |
| Colon                                 | Stop Gained                  | R97*           | chr7:g.680615G>A                                        | PRKAR1B |
| Colon                                 | Missense                     | R94H           | chr7:g.680623C>T                                        | PRKAR1B |
| Colon                                 | Missense                     | V36I           | chr7:g.711400C>T                                        | PRKAR1B |
| Corpus uteri                          | Missense                     | R368M          | chr7:g.550473C>A                                        | PRKAR1B |
| Corpus uteri                          | Missense                     | L359M          | chr7:g.550501G>T                                        | PRKAR1B |
| Corpus uteri                          | Missense                     | A337T          | chr7:g.550567C>T                                        | PRKAR1B |
| Corpus uteri                          | Missense                     | M245I          | chr7:g.584542C>T                                        | PRKAR1B |
| Corpus uteri                          | Missense                     | T239M          | chr7:g.584561G>A                                        | PRKAR1B |
| Corpus uteri                          | Missense                     | R233H          | chr7:g.596156C>T                                        | PRKAR1B |
| Corpus uteri                          | Missense                     | R233C          | chr7:g.596157G>A                                        | PRKAR1B |
| Corpus uteri                          | Missense                     | R232Q          | chr7:g.596159C>T                                        | PRKAR1B |
| Corpus uteri                          | Missense                     | R228Q          | chr7:g.596171C>T                                        | PRKAR1B |
| Corpus uteri                          | Missense                     | G208C          | chr7:g.596232C>A                                        | PRKAR1B |
| Corpus uteri                          | Splice Acceptor substitution | X184_splice    | chr7:g.596305C>A                                        | PRKAR1B |
| Corpus uteri                          | Missense                     | H140Y          | chr7:g.677251G>A                                        | PRKAR1B |
| Corpus uteri                          | Missense                     | R95H           | chr7:g.680620C>T                                        | PRKAR1B |
| Corpus uteri                          | Frameshift Insertion         | N88Efs*56      | chr7:g.680643_680644insG                                | PRKAR1B |
| Corpus uteri                          | Frameshift Deletion          | L66Wfs*26      | chr7:g.680707delA                                       | PRKAR1B |
| Corpus uteri                          | Missense                     | R63G           | chr7:g.680717T>C                                        | PRKAR1B |
| Corpus uteri                          | Stop Gained                  | E61*           | chr7:g.680723C>A                                        | PRKAR1B |
| Corpus uteri                          | Missense                     | E58D           | chr7:g.711332C>A                                        | PRKAR1B |
| Corpus uteri                          | Missense                     | V30I           | chr7:g.711418C>T                                        | PRKAR1B |
| Corpus uteri                          | Missense                     | E10D           | chr7:g.711476C>A                                        | PRKAR1B |
| Corpus uteri                          | Missense                     | P8H            | chr7:g.711483G>T                                        | PRKAR1B |
| Corpus uteri; Brain                   | Missense                     | A213V          | chr7:g.596216G>A                                        | PRKAR1B |
| Corpus uteri; Stomach; Colon          | Frameshift Deletion          | P87Rfs*5       | chr7:g.680644delG                                       | PRKAR1B |
| Esophagus                             | Splice Donor substitution    | X147_splice    | chr7:g.677228C>A                                        | PRKAR1B |
| Esophagus                             | Missense                     | E55K           | chr7:g.711343C>T                                        | PRKAR1B |
| Other and unspecified parts of tongue | Missense                     | D291N          | chr7:g.579276C>T                                        | PRKAR1B |
| Other and unspecified parts of tongue | Missense                     | V215M          | chr7:g.596211C>T                                        | PRKAR1B |
| Ovary                                 | Missense                     | I255M          | chr7:g.584512G>C                                        | PRKAR1B |
| Ovary                                 | Missense                     | Y207F          | chr7:g.596234T>A                                        | PRKAR1B |
| Ovary                                 | Missense                     | S147R          | chr7:g.607452A>C                                        | PRKAR1B |
| Ovary                                 | Splice Acceptor deletion     | X60_splice     | chr7:g.680691delTGACTTTTGCCCG<br>GCCAAATCTGCCTGTTTCTTCC | PRKAR1B |
| Pancreas                              | Missense                     | V111M          | chr7:g.680573C>T                                        | PRKAR1B |
| Prostate gland                        | Missense                     | I282T          | chr7:g.579302A>G                                        | PRKAR1B |
| Prostate gland                        | Missense                     | R146S          | chr7:g.677231C>G                                        | PRKAR1B |
| Rectum                                | Missense                     | E356K          | chr7:g.550510C>T                                        | PRKAR1B |
| Skin                                  | Missense                     | Q371R          | chr7:g.550464T>C                                        | PRKAR1B |
| Skin                                  | Missense                     | S363F          | chr7:g.550488G>A                                        | PRKAR1B |
| Skin                                  | Missense                     | P353L          | chr7:g.550518G>A                                        | PRKAR1B |
| Skin                                  | Missense                     | P119S          | chr7:g.677314G>A                                        | PRKAR1B |
| Skin                                  | Missense                     | P43L           | chr7:g.711378G>A                                        | PRKAR1B |
| Stomach                               | Missense                     | A268V          | chr7:g.579344G>A                                        | PRKAR1B |
| Stomach                               | Missense                     | G208S          | chr7:g.596232C>T                                        | PRKAR1B |
| Stomach                               | Missense                     | I818R          | chr7:g.596292C>T                                        | PRKAR1B |
| Stomach                               | Frameshift Insertion         | I27Dfs*53      | chr7:g.711427_711428insC                                | PRKAR1B |
| Stomach                               | Missense                     | E10A           | chr7:g.711477T>G                                        | PRKAR1B |
